# Supplementary material
Source: publisher figshare collection journal article supplement (https://acs.figshare.com/ndownloader/files/31074490)
Supplement: Supplementary file 1 [file 31074490]

# ***SUPPORTING INFORMATION***

## ***In Vivo*** Evaluation of Multifunctional Gold Nanorods for Boron Neutron Capture and Photothermal Therapies

*Krishna R. Pulagam,<sup>a</sup> Malou Henriksen-Lacey,<sup>a,b</sup> Kepa B. Uribe,<sup>a</sup> Carlos Renero-Lecuna,<sup>a</sup> Jatish Kumar,<sup>c</sup> Alexandra Charalampopoulou,<sup>d</sup> Angelica Facoetti,<sup>d</sup> Nicoletta Protti,<sup>e,f</sup> Vanessa Gómez-Vallejo,<sup>a</sup> Zuriñe Baz,<sup>a</sup> Vished Kumar,<sup>a</sup> Ana Sánchez-Iglesias,<sup>a,b</sup> Saverio Altieri,<sup>e,f</sup> Unai Cossío,<sup>a</sup> Desire Di Silvio,<sup>a</sup> Angel M. Martínez-Villacorta,<sup>a</sup> Ane Ruiz de Angulo,<sup>g</sup> Luka Rejc,<sup>a,h</sup> Luis M. Liz-Marzán,<sup>a,b,i</sup> and Jordi Llop<sup>\*a,j</sup>*

<sup>a</sup> CIC biomaGUNE, Basque Research and Technology Alliance (BRTA), Paseo de Miramón 194, 20014 Donostia-San Sebastian, Spain.

<sup>b</sup> Centro de Investigación Biomédica en Red de Bioingeniería, Biomateriales y Nanomedicina (CIBER-BBN), Paseo de Miramón 194, 20014 Donostia-San Sebastian, Spain

<sup>c</sup> Department of Chemistry, Indian Institute of Science Education and Research (IISER) Tirupati, Tirupati 517507, India.

<sup>d</sup> Research and Development Department, CNAO National Center for Oncological Hadrontherapy, Pavia, Italy.

<sup>e</sup> Department of Physics, University of Pavia, 27100 Pavia, Italy.

<sup>f</sup> National Institute of Nuclear Physics, Pavia Section, 27100 Pavia, Italy.

<sup>g</sup> CIC bioGUNE, Basque Research and Technology Alliance (BRTA), Bizkaia Science & Technology Park bld 801 A, 48160 Derio, Bizkaia, Spain.

<sup>h</sup> University of Ljubljana, Faculty of Chemistry and Chemical Technology, Večna pot 113, Ljubljana, Slovenia.

<sup>i</sup> Ikerbasque, Basque Foundation for Science, 48013 Bilbao, Spain.

<sup>j</sup> Centro de Investigación Biomédica en Red de Enfermedades Respiratorias (CIBERES), 28029 Madrid, Spain.

\* e-mail: [jllop@cicbiomagune.es](mailto:jllop@cicbiomagune.es); Phone number: +34 943 005 333

## Evaluation of the number of reactions per second on $^{10}\text{B}$ and $^{197}\text{Au}$ by thermal neutrons

Consider a mass  $m_{Au}$  exposed to a thermal neutron flux  $\Phi$  ( $\text{cm}^{-2}\text{s}^{-1}$ ). The number of reactions per second ( $R_{Au}$ ) that occur during the neutron irradiation is given by:

$$R_{Au} = \frac{m_{Au}}{A_{Au}} N_A \sigma_{Au} \Phi$$

where  $A_{Au}$  is the mass number of  $Au$ ,  $N_A$  is the Avogadro number and  $\sigma_{Au}$  the capture cross section for thermal neutron of  $^{197}\text{Au}(\text{n},\gamma)^{198}\text{Au}$  reaction.

Similarly, for a mass  $m_B$  of  $^{10}\text{B}$  exposed to the same flux of thermal neutrons the number of reactions per second  $R_B$  is given by:

$$R_B = \frac{m_B}{A_B} N_A \sigma_B \Phi$$

where  $A_B$  is the mass number of  $^{10}\text{B}$ , and  $\sigma_B$  the capture cross section for thermal neutron of  $^{10}\text{B}(\text{n},\alpha)^7\text{Li}$  reaction on which the BNCT is based.

Therefore, the ratio between the number of reactions per second between  $^{10}\text{B}$  and  $^{197}\text{Au}$  is given by:

$$\frac{R_B}{R_{Au}} = \frac{m_B}{m_{Au}} \frac{A_{Au}}{A_B} \frac{\sigma_B}{\sigma_{Au}} = \frac{m_B}{m_{Au}} \frac{197}{10} \frac{3840}{98.8} = \frac{m_B}{m_{Au}} 765.7$$

For AuNRs we have  $\frac{m_B}{m_{Au}} = 0.1$

If the Boron used in AuNRs is a 100%  $^{10}\text{B}$  enriched:

$$\frac{R_B}{R_{Au}} = \frac{m_B}{m_{Au}} 765.7 = 0.1 \cdot 765.7 = 76.57$$

If natural Boron (20%  $^{10}\text{B}$  and 80%  $^{11}\text{B}$ ) is used in GNR, then:

$$\frac{R_B}{R_{Au}} = \frac{m_B}{m_{Au}} 765.7 = 0.1 \cdot 0.2 \cdot 765.7 = 15.3$$

The previous numbers confirm that considering the gold/boron composition of our nanosystems, and assuming natural abundance of  $^{10}\text{B}$  (20%), for every 15 reactions on

$^{10}\text{B}$  there is only one reaction on the  $^{197}\text{Au}$ ; in the case of a 100% abundance of  $^{10}\text{B}$  (as used in BNCT) there is one reaction on  $^{197}\text{Au}$  every about 77 reactions on  $^{10}\text{B}$ .

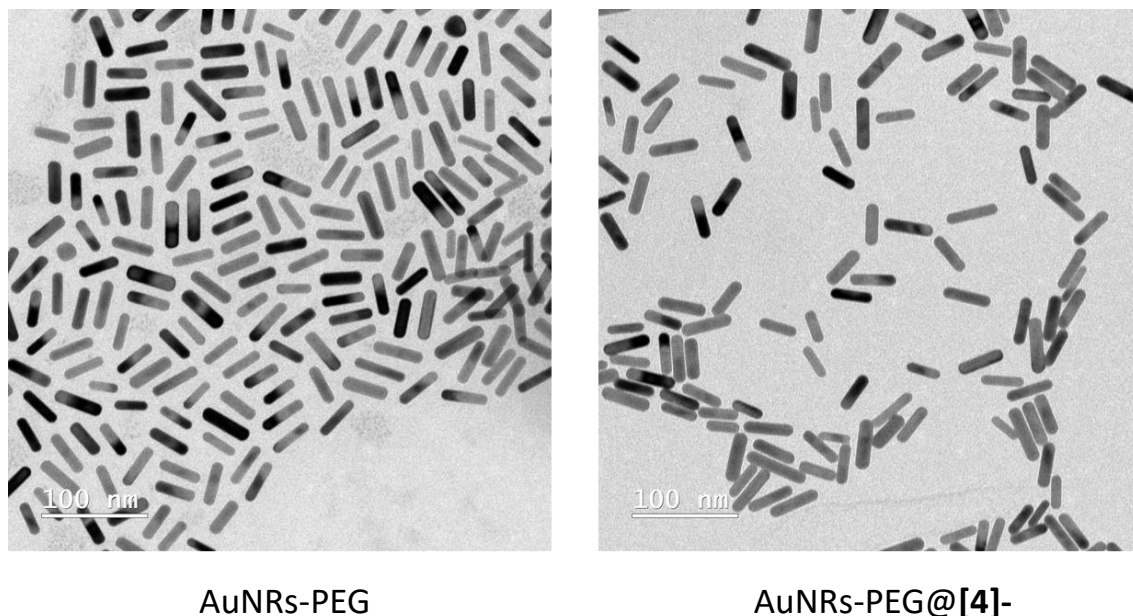

**Figure S1.** Representative TEM micrographs of AuNRs-mPEG (left) and AuNR-mPEG@[4]<sup>-</sup> (right), prior to laser irradiation.

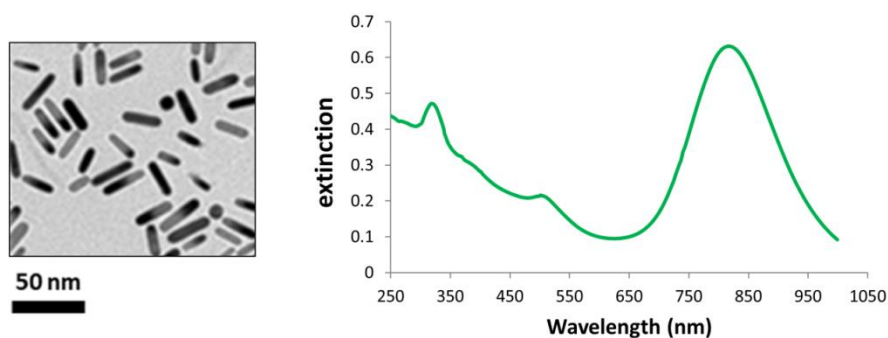

**Figure S2.** Left: Representative transmission electron micrograph (TEM) of  $^{64}\text{Cu}$ AuNR-mPEG@[4]<sup>-</sup>. Right: UV-Vis-NIR extinction spectrum of  $^{64}\text{Cu}$ AuNR-mPEG@[4]<sup>-</sup>. Both characterizations were performed after complete radioactive decay.

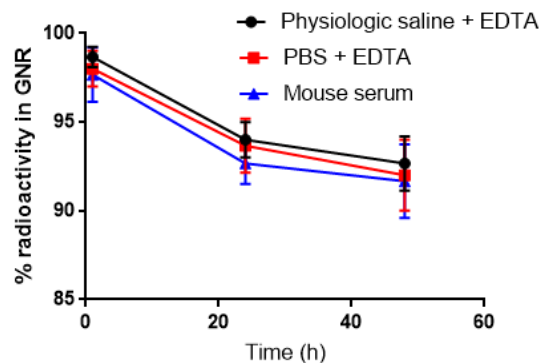

**Figure S3.** Radiochemical stability of AuNR-mPEG@[4]<sup>-</sup> at different incubation times in 0.9% NaCl + 2.5 mM EDTA, 10 mM PBS + 2.5 mM EDTA, and mouse serum.

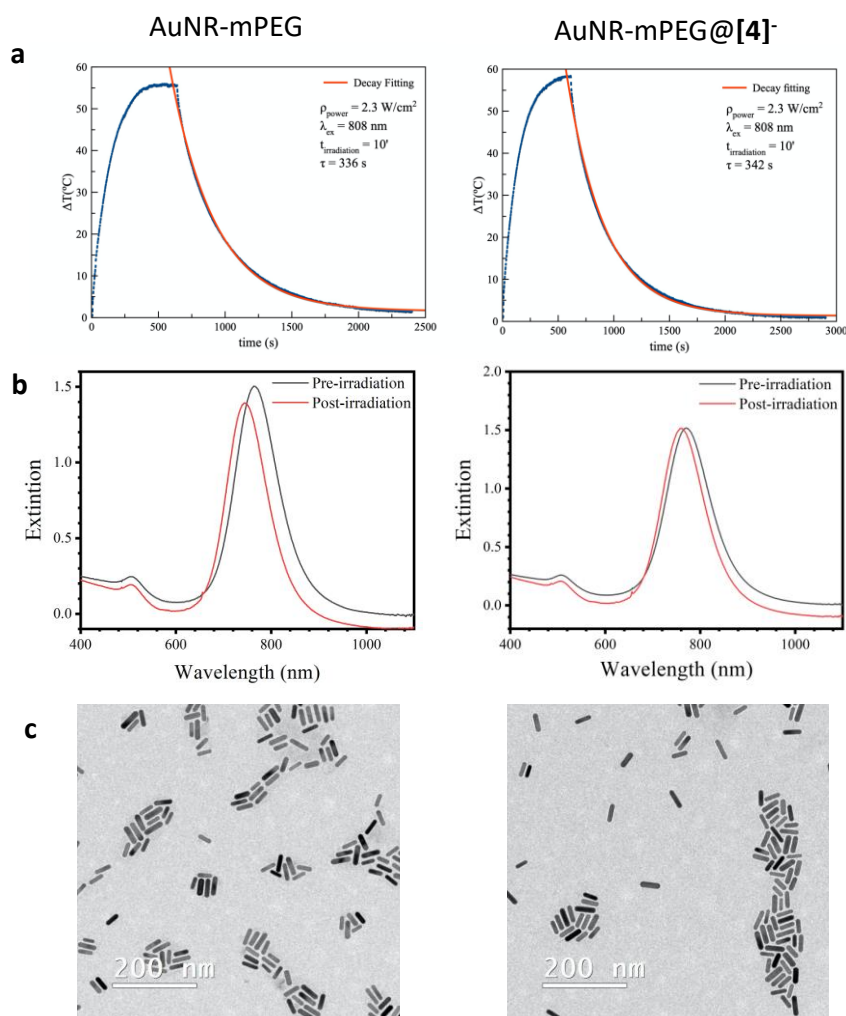

**Figure S4.** Effect of laser irradiation on AuNR-mPEG and AuNR-mPEG@[4]<sup>-</sup> ([Au] = 20  $\mu\text{g/mL}$ , laser power = 2.3  $\text{W/cm}^2$ ). Photothermal characterization (a), UV-Vis spectra (b), and representative TEM micrographs (c), obtained before (left column) and after (right column) laser irradiation. A slight decrease in aspect ratio is observed post irradiation, correlating to a slight LSPR blue shift of 20 nm and 11 nm for AuNR-mPEG and AuNR-mPEG@[4]<sup>-</sup> AuNRs, respectively.

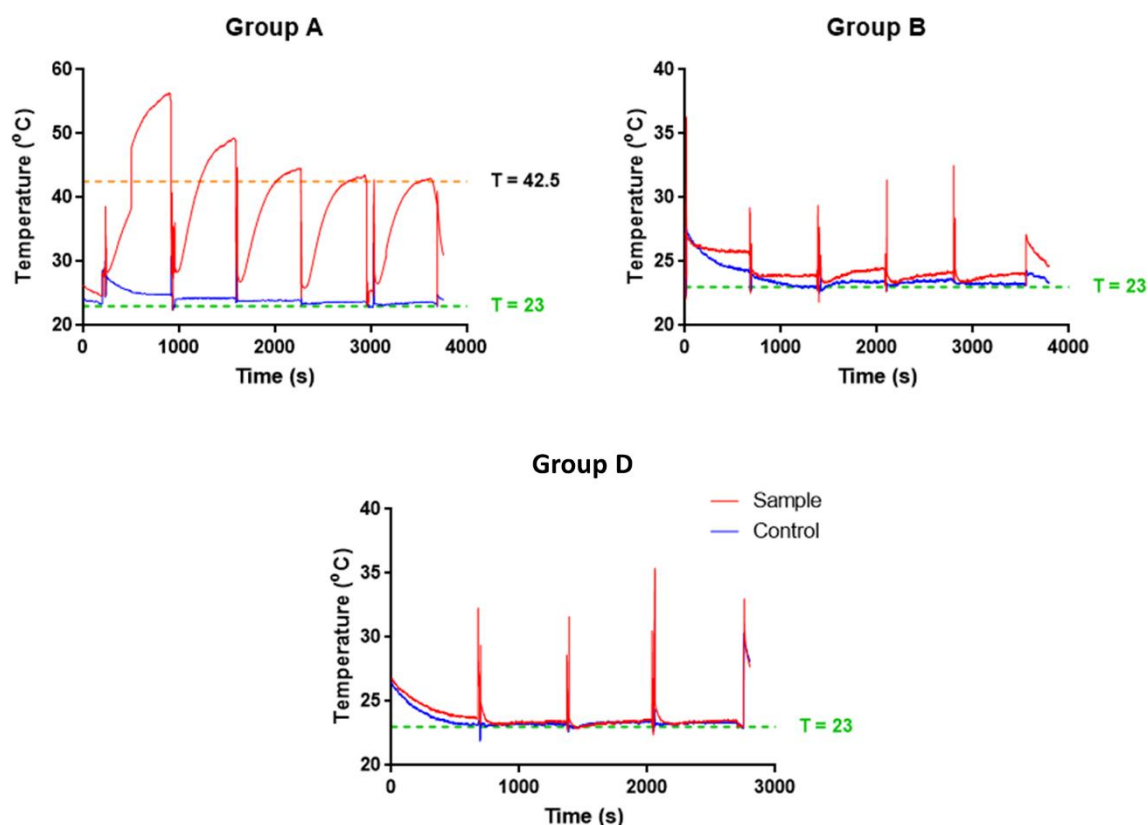

**Figure S5.** Temperature curves of the irradiated wells for groups A-C. Red curves represent temperature profiles of wells containing the spheroids; blue lines represent temperature profiles of adjacent empty wells; Group A: spheroids incubated with AuNRs (concentration = 20  $\mu\text{g/mL}$  in gold) followed by NIR irradiation; B: spheroids incubated with AuNRs followed by media exchange and NIR irradiation; Group D, spheroids incubated in the absence of AuNRs and subjected to laser irradiation.

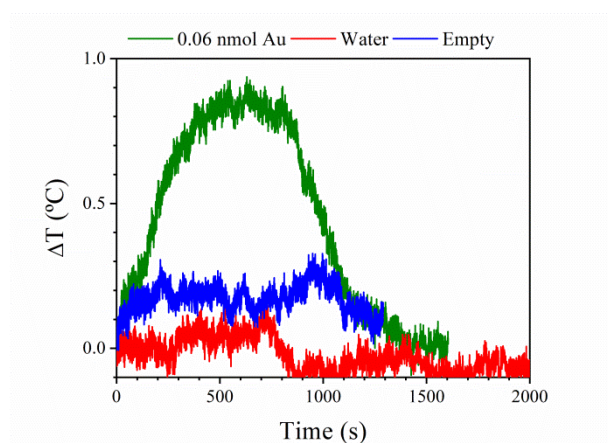

**Figure S6.** Temperature curves obtained during NIR irradiation of an aqueous solution containing AuNR-mPEG@[4]<sup>+</sup> at a concentration of 64 pmol/100  $\mu\text{L}$  (green line). Red and blue curves represent temperature profiles of wells containing water and air, respectively.
